# Supplementary material
Source: PubMed Central journal article supplement (PMC5100979)
Supplement: NIHMS826712-supplement-Figure_1.pdf [file NIHMS826712-supplement-Figure_1.pdf]

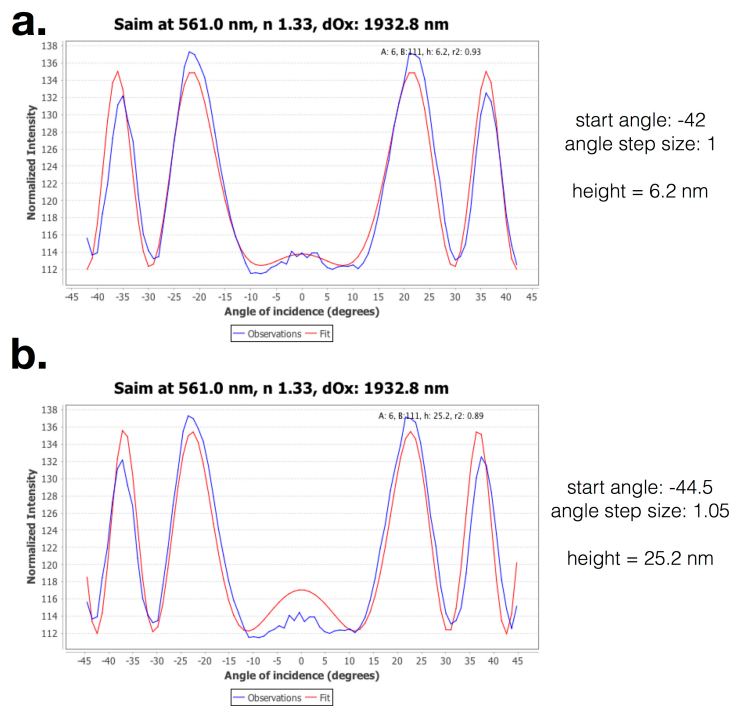

### Supplementary Figure 1

Height error introduced by calibration error.

(a) Correctly calibrated data. SAIM Data from a DiI labeled supported lipid bilayer fit correctly. Intensity measurements were taken at 1-degree intervals from  $-42^\circ$  to  $42^\circ$ . (b) Incorrectly calibrated data. The same data as in a, fit with a false calibration wherein the measurements were aligned to a start angle of  $-44.5^\circ$  and an angle step size of  $1.05^\circ$ .
